## Original Article

# Feeding and growth of Atlantic cod (*Gadus morhua* L.) in the eastern Baltic Sea under environmental change

Stefan Neuenfeldt <sup>1\*</sup>, Valerio Bartolino<sup>2</sup>, Alessandro Orio <sup>2</sup>, Ken H. Andersen<sup>1</sup>, Niels G. Andersen<sup>1</sup>, Susa Niiranen<sup>3</sup>, Ulf Bergström<sup>4</sup>, Didzis Ustups<sup>5</sup>, Nataliia Kulatska<sup>2</sup>, and Michele Casini <sup>2</sup>

<sup>1</sup>National Institute of Aquatic Resources, Technical University of Denmark, 2800 Kongens Lyngby, Denmark

<sup>2</sup>Department of Aquatic Resources, Institute of Marine Research, Swedish University of Agricultural Sciences, Turistgatan 5, Lysekil 45330, Sweden

<sup>3</sup>Stockholm Resilience Centre, Stockholm University, Kräftriket 2B, Stockholm 10691, Sweden

<sup>4</sup>Department of Aquatic Resources, Institute of Coastal Research, Swedish University of Agricultural Sciences, Skolgatan 6, Öregrund 74242, Sweden

<sup>5</sup>Fish Resources Research Department, Institute of Food Safety, Animal Health and Environment, Daugavgrivas 8, Riga 1048, Latvia

\*Corresponding author: tel: +45 3396 3402; e-mail: [stn@aqu.dtu.dk](mailto:stn@aqu.dtu.dk).

Neuenfeldt, S., Bartolino, V., Orio, A., Andersen, K. H., Andersen, N. G., Niiranen, S., Bergström, U., Ustups, D., Kulatska, N., and Casini, M. Feeding and growth of Atlantic cod (*Gadus morhua* L.) in the eastern Baltic Sea under environmental change. – ICES Journal of Marine Science, 77: 624–632.

Received 17 May 2019; revised 7 October 2019; accepted 24 October 2019; advance access publication 26 November 2019.

Five decades of stomach content data allowed insight into the development of consumption, diet composition, and resulting somatic growth of *Gadus morhua* (Atlantic cod) in the eastern Baltic Sea. We show a recent reversal in feeding level over body length. Present feeding levels of small cod indicate severe growth limitation and increased starvation-related mortality. For young cod, the low growth rate and the high mortality rate are manifested through a reduction in size-at-age. The low feeding levels are likely the result of a decrease in benthic prey abundance due to increased hypoxic areas, while decreasing abundances of pelagic species in the area of cod distribution have prevented a compensatory shift in diet. Our study emphasizes that environmental forcing and the decline in pelagic prey caused changes in consumption and growth rates of small cod. The food reduction is amplified by stunted growth leading to high densities of cod of smaller size competing for the scarce resources. The average growth rate is negative, and only individuals with feeding levels well above average will survive, though growing slowly. These results suggest that the relation between consumption rate, somatic growth and predator-prey population densities is strongly environmentally mediated.

**Keywords:** Baltic Sea, bioenergetics modelling, environmental change, *Gadus morhua*, growth, predation, stomach data.

## Introduction

The somatic growth of consumers depends on the availability of suitable food items (Ursin, 1967; Fretwell, 1987). Food deprivation leads to stunted growth (Deelder, 1951; Amundsen and Klemetsen, 1988) and in the worst case to starvation (Dutil and Lambert, 2000). Reduced growth of predatory fishes may also hamper the ontogenetic transition to an energetically more profitable, piscivorous diet (Werner and Gilliam, 1984), because of insufficient mouth gape size (Werner, 1974) and other attack capabilities, such as fast-start swimming (Domenici and Blake,

1997). In this way, decreased somatic growth can affect the structuring role of a predator in the ecosystem (Brooks and Dodson, 1965; Hall *et al.*, 1976), as previously suitable prey species are released from predation.

Food restriction at population level can be ascribed to density dependence, assuming that an increase in predator density leads to a decrease in the amount of prey available per individual predator (Murdoch, 1994; Turchin, 2003), reduced prey availability controlled by environmental conditions or anthropogenic activities, such as fisheries (Uzars, 1994; Neuenfeldt and Beyer, 2006;

ICES, 2018), or a combination of the two processes. The effects of environmental changes can be immediate, as for example hypoxia events (Diaz and Rosenberg, 2008), or changes in predator-prey spatial overlap (Neuenfeldt and Beyer, 2006). On the other hand, the effects of density dependence are often delayed (Murray, 1994). This interplay between environmental changes and density dependence in shaping the dynamics of marine fish predators and prey populations is complex and difficult to unravel.

During the past four decades, the Baltic Sea ecosystem went through a major reorganization with two alternative states separated by a transition period in 1988–1993 (Möllmann *et al.*, 2009). The first state is characterized by high fish predator (eastern Baltic cod, *Gadus morhua* L., hereafter simply referred to as cod) and low pelagic prey (sprat, *Sprattus sprattus* L.) abundances, and the second state is characterized by decreased cod and increased sprat abundances (Möllmann *et al.*, 2009; Casini, 2013). This shift has been attributed to a combination of overfishing of cod intertwined with unfavourable environmental conditions for cod reproduction and favourable conditions for sprat recruitment (Alheit *et al.*, 2005; Casini, 2013). Since the end of the 1970s, the frequency of major inflows of saline water to the brackish Baltic Sea has decreased drastically (Matthäus and Schinke, 1994). The lack of renewed bottom water has led to massive environmental changes, in particular hypoxia in the bottom water (Carstensen *et al.*, 2014), accentuated by high nutrient loading from land-based sources (Österblom *et al.*, 2007), and consequently decreased productivity of benthic prey (Karlson *et al.*, 2002). Hypoxia is common rather than an exception since 2005 and nowadays also extends into the main area of cod distribution (Casini *et al.*, 2016).

In this changed ecosystem, a shift of the cod stock size structure towards smaller sizes and decline in maximum length has been observed and advocated to be due to a decline in growth (Svedäng and Hornborg, 2014; Ero *et al.*, 2015; Orio *et al.*, 2017). However, the problematic age determination of eastern Baltic cod (Ero *et al.*, 2015) has prevented a confirmation of this theory and, therefore, the mechanistic understanding of these observations.

In this study, we investigate changes in the diet composition of the eastern Baltic cod, its feeding levels and consumption rates, and their consequences for growth and mortality over five decades using stomach content data in combination with bioenergetics models. After the larval stage, cod experiences two feeding modes. Small, post-settlement 4–16-cm cod mainly consume benthic invertebrates (Hüssy *et al.*, 1997), while larger individuals consume a mixture of fish and benthic invertebrates (Uzars, 1994; Neuenfeldt and Beyer, 2006; Pachur and Horbowy, 2013). We, therefore, examine the ontogenetic development of diet composition and energy intake to identify life stages with critical feeding conditions. Subsequently, we track the temporal dynamics in feeding levels and growth during these sensitive life stages. Using empirical data and bioenergetics, we address the following questions: (i) Have size-specific feeding levels changed during the past five decades and which are the likely causes? (2) What are the expected long-term changes in cod growth considering the changes in feeding level? (3) When during life history is the bottleneck for cod growth and survival?

## Material and methods

### Stomach data

Approximately 120 000 stomachs of Atlantic cod in the eastern Baltic Sea have been sampled by trawling between 1963 and 2014

(Figure 1). Sampling covered the distributional area of the eastern Baltic cod population (Bagge, 1994) except in the period 1995–2004, where sampling was limited to the north-eastern part. Prey items in the stomachs were recorded at the highest possible taxonomic resolution with total mass and, where identifiable, number of individuals and lengths per prey taxon. At least individual predator length was also recorded (except 1975–1979), and in later years also predator weight (Huwer *et al.*, 2014; ICES, 2014a). The data are available at ICES ([www.ices.dk](http://www.ices.dk)).

Previous studies have shown that 15–40% of cod stomachs are empty (Uzars, 1994; Neuenfeldt and Beyer, 2003), which has an important impact on estimates of population-level mean consumption rate. Whether or not a stomach is truly empty, or the fish has regurgitated the content during trawling and processing, was deducted from the appearance of the gall bladder (ICES, 1991) since the mid-1980s. In the stomach sampling for the last decade, cod with signs of regurgitation have been replaced during sampling by randomly selected individuals of the same length and with stomach contents (Huwer *et al.*, 2014). However, whether the treatment of cod with signs of regurgitation has been the same for the sampling between 1963 and 2005 is unknown. Exploratory analyses indicate, though, that in this earlier period at least not all cod with signs of regurgitation have been discarded. Consequently, temporal differences in the fraction of empty stomachs before and after 2005 are possibly a sampling artefact and the fraction probably being over-estimated from the data until 2005. This means that calculated decreases in consumption rates after 2005 would be conservative estimates since they were probably more pronounced in reality. Constant or increasing consumption rates would, on the other hand, be difficult to verify, because any increase or constant levels of average population-level consumption rates might be due to the lower observed fraction of empty stomachs after 2005.

### Consumption rates and feeding levels

The average daily energy consumption rates  $C$  (kilojoules per day) were estimated using the cylinder gastric evacuation rate model (Andersen and Beyer, 2005a, b) by year and 1-cm predator length group for cod with the total length of between 20 and 80 cm, amounting to 109 000 stomachs in this size range from the stomach database. Experienced temperature  $T$  was assumed constant at 5°C, corresponding roughly to the average temperature experienced by cod in the Baltic Sea (Righton *et al.*, 2010). Note that the focus in this study is to compare consumption rates in different periods. Although cod experience varying temperatures throughout the year, only significant trends in average temperature regime for the cod in their preferred habitat might potentially bias our analyses. Such trends have not been shown for the Baltic Sea. We assumed constant energy densities  $E_i$  for benthic prey (3.5 kJ g<sup>-1</sup>) and consumed fishes [*Clupea harengus* L. (herring) and sprat 5.5 kJ g<sup>-1</sup> and cod 4.0 kJ g<sup>-1</sup>; Pedersen and Hislop, 2001].  $E$  denotes the average energy densities (kilojoules per gram) of the individually observed total stomach contents  $S$  (gram). Using the principle that consumption rate  $C$  (kilojoules per day) on average over population and time equals evacuation rate (Pennington, 1985), and knowing the total length  $L$  (cm) of cod and the basic evacuation rate parameter  $\rho_0 = 2.43 \times 10^{-3}$ , we used the parametrization of the cylinder model for cod presented in Andersen (2012):

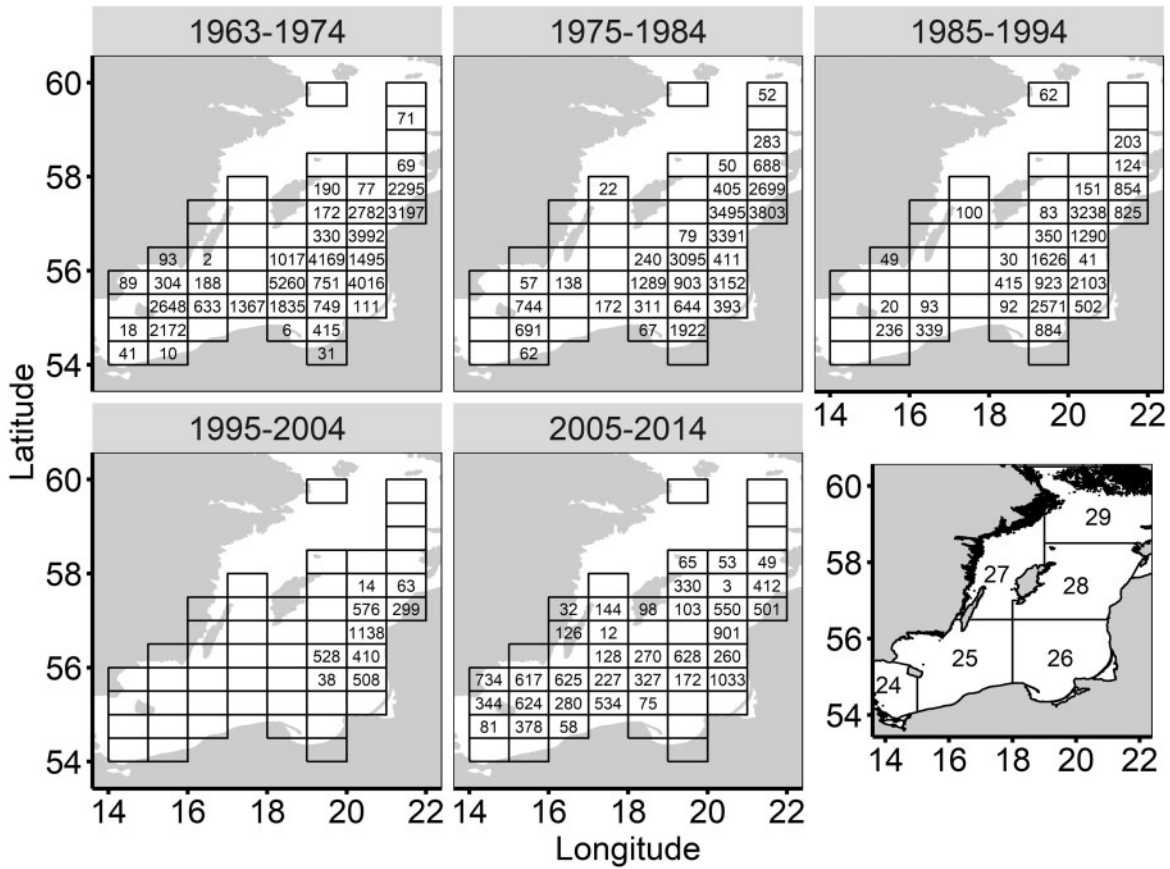

**Figure 1.** ICES sub-divisions (bottom right panel) and stomach sampling coverage: number of *Gadus morhua* stomachs by ICES statistical rectangle for each period specified on top of each panel.

$$C = 24 \rho_0 L^{1.30} e^{0.083T} E^{0.15} \sqrt{S}. \quad (1)$$

The feeding level  $f$  is the actual energy intake  $C$  expressed relative to maximum sustained energy intake  $C_{\max}$  ( $f = C/C_{\max}$ ). The maximum intake  $C_{\max}$  was obtained from [Jobling \(1988\)](#):

$$C_{\max} = 0.223e^{(0.104T - 0.000112T^3)} W^{0.802}, \quad (2)$$

where  $T$  is the temperature ( $^{\circ}\text{C}$ ). The stomach data rarely specified cod weight  $W$  (g); so here a relationship based on data from the Danish part of the Baltic International Trawl Survey (BITS) covering the cod distributional area (data on [www.ices.dk](http://www.ices.dk)) was used:

$$W = 6.838 \times 10^{-3} L^{3.07}. \quad (3)$$

The condition of cod in the eastern Baltic Sea has declined since 1990. We have not considered this when calculating  $C_{\max}$ , and thus feeding level  $f$ , because the condition of the cod used by [Jobling \(1988\)](#) to establish (2) is unknown. The assimilative capacity of fish is related to the structural size (i.e. the body length) rather than the condition and hence the body mass (e.g. [Andersen, 2001](#)). The consequence is that our estimates of  $C_{\max}$  using (2) become lower and, thus, that of  $f$  becomes higher, when condition declines because the body mass at specific length becomes lower. This further means that our estimates of the

temporal development of  $f$  are conservative—for example the decline in small cod is probably more pronounced than we find.

### Bioenergetics growth model

We estimated the somatic growth rates  $P_B$  (kilojoules per day) from the observed feeding levels using a simplified energy balance equation ([Andersen and Riis-Vestergaard, 2003](#)):

$$P_B = \kappa f C_{\max} - R_S - R_A, \quad (4)$$

where the net food conversion efficiency  $\kappa$  is described by a simple power function of food consumption rate  $\kappa = 0.426 (f C_{\max})^{0.109}$ , and  $R_S = 5.52 (0.001 W)^{0.75} e^{0.08T}$  ([Andersen and Riis-Vestergaard, 2003](#)) and  $R_A$  are standard metabolic rate and costs of swimming activity (kilojoules per day).  $R_A$  is determined by the activity multiplier 1.25 ([Hansson et al., 1996](#)) as  $R_S + R_A = 1.25 R_S$ . Due to the focus on juvenile cod, gonadal maturation was assumed to be negligible in the bioenergetics growth model and set to 0. Body mass (g) was determined iteratively as  $W_{t+\Delta t} = W_t + P_{B,t} (0.057 L_t + 3.37)$ . The energy to mass conversion factor  $0.057 L_t + 3.37$  ([Pedersen and Hislop, 2001](#)) was assumed to depend on length only. Time increments  $\Delta t$  were in daily steps, and the length was measured in centimetres and was calculated using (3).

**Observational data on catch per unit of effort and hypoxic areas**

Indices of cod density in the first quarter of the year (calculated as catch per unit of effort, in numbers per hour; herein referred to as density) from the BITS in ICES sub-divisions 25, 26, and 28 were retrieved from the ICES DATRAS database (<http://www.ices.dk/marine-data/data-portals/Pages/DATRAS.aspx>). The indices are based on bottom trawl hauls typically swept between 20- and 100-m depth, whereas hauls shallower than 20 m and deeper than 100 m are very rare (ICES, 2014b).

Time series of total areas (kilometer square) of hypoxic bottoms [here taken as areas between 20- and 100-m depth (Casini et al., 2016) with an oxygen concentration of  $<1 \text{ ml l}^{-1}$ , i.e.  $\sim 1.4 \text{ mg l}^{-1}$ ] by sub-division (25, 26, and 28) were obtained from the Swedish Meteorological and Hydrological Institute ([www.smhi.se](http://www.smhi.se)). We used  $1 \text{ ml l}^{-1}$  as threshold for hypoxia to indicate failure in benthic productivity (Karlson et al., 2002; Conley et al., 2009).

**Results**

The data show a pronounced change in the average mass of prey in stomachs containing that prey for all sizes of cod after the Baltic regime shift (Figure 2). The mass of the benthic isopod *Saduria entomon* in the stomachs in the period 1963–1988 was increasing constantly with increasing cod size, while in the period 1994–2014, after the regime shift, the mass of *S. entomon* is rather constant at a low level through cod ontogeny. The mass of the

nekto-benthic crustacean *Mysis mixta* increased slightly in the diet of cod  $<35 \text{ cm}$  but decreased in the diet of cod  $>35 \text{ cm}$  after the regime shift, although the biomass of this prey in the stomachs has been small throughout the entire time series. Sprat mass has also declined in the stomachs of small cod, with the decline becoming more obvious with increasing cod size after the regime shift. The average mass of herring in the stomachs of larger cod remained unchanged between the two periods, while herring mass in the stomachs increased in the later period for cod between 25 and 35 cm. (Figure 2). In the most recent period, there is on average about twice as much cod in the stomach of cod  $>40 \text{ cm}$  than before the regime shift. The mass of other prey, mainly benthic organisms and flatfish, in the cod stomachs increased for cod  $>50 \text{ cm}$  after the regime shift.

The average daily consumption rate of 20–30-cm cod increased in the beginning of the time series, reached a maximum in 1990s, and rapidly decreased in the early 2000s (Figure 3). In contrast, consumption of 30–40-cm cod showed an increasing trend during the whole time series, except for a slight decline in early 1990s (Figure 3). This development is the same also for cod  $>40 \text{ cm}$  (not shown here). In connection to the diet represented in Figure 2, the decrease in consumption rates of cod  $<30 \text{ cm}$  is due to a reduction in benthos and to a limited extent also of sprat in the diet, partially compensated by increased herring consumption. The minor increase in the consumption rates of 30–40-cm cod is driven by increased consumption on mysids and herring and a few observations of cannibalism.

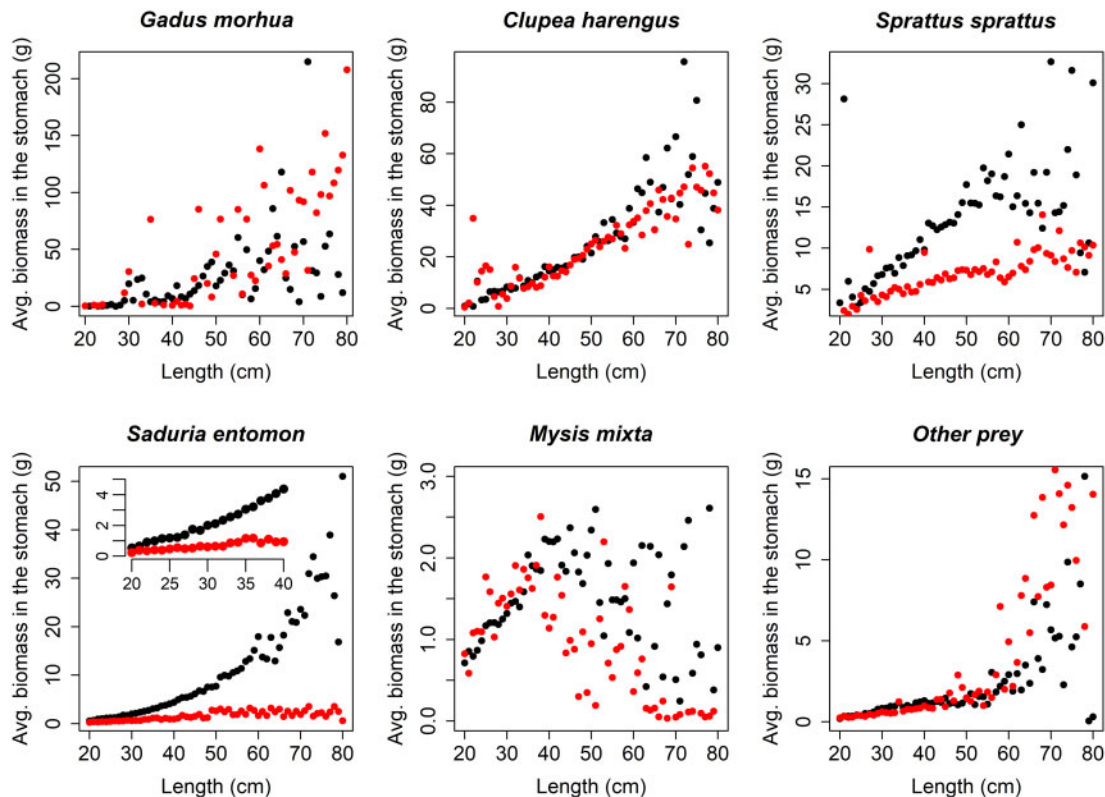

**Figure 2.** Diet composition in *Gadus morhua* stomachs by average mass, given that the specific prey is found in the stomach, before 1988 (dark closed dots) and after 1994 (light closed dots). The transition period between ecological regimes from 1988 to 1993 (Möllmann et al., 2009) is left out. The diet is given in average biomass observed in the stomachs of a given length (centimetres) during the two respective periods. For *Saduria entomon*, the biomass in the stomachs is given in an insert for cod with the total length of  $\leq 40 \text{ cm}$ .

The decreasing consumption rates of small cod in the latest years, and the average increasing rates for larger ones, become clearly visible in the development of feeding levels over cod length during the last five decades (Figure 4). Feeding levels of cod 20–30 cm were among the lowest on record in 2005–2014. Low average feeding levels of 20–30-cm cod, comparable with the recent low values, could also be observed in 1965–1974. The average feeding levels of larger cod were continuously increasing with

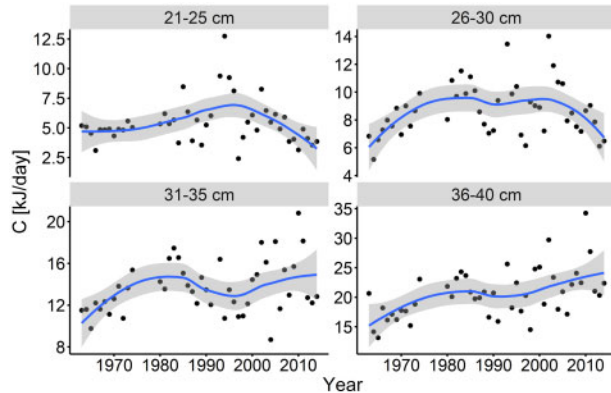

**Figure 3.** Trends in daily food consumption rate of *Gadus morhua* in four length classes; locally estimated scatterplot smoothing based trend-lines are plotted together with shadowed confidence limits.

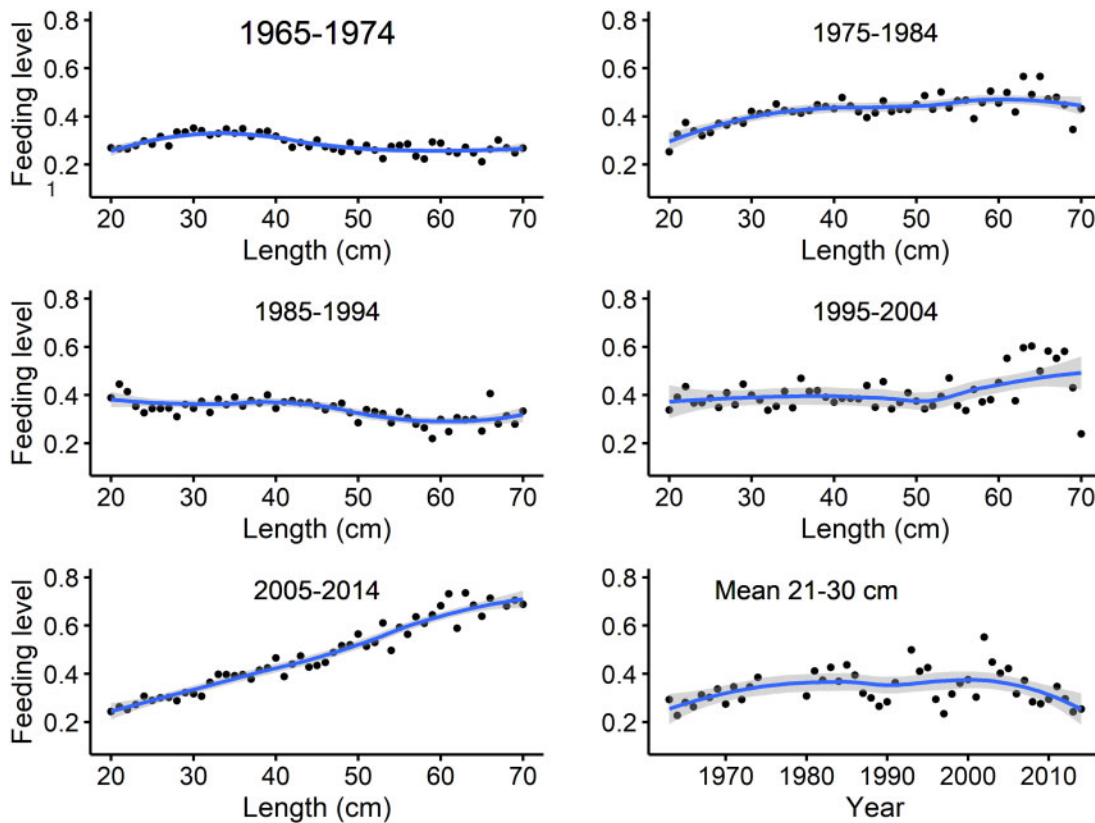

**Figure 4.** Feeding levels of *Gadus morhua* by length during the past five decades. Locally estimated scatterplot smoothing based trend-lines are plotted together with shadowed confidence limits. The lower right panel: feeding level over time for *G. morhua* with the total length of 21–30 cm.

length during 2005–2014, which was unseen in the four decades before.

The growth curve of immature cod in the last decade, emerging from the bioenergetics model, differed clearly from the four decades before, with average growth becoming negative (Figure 5). This negative modelled average growth implies that, *in vivo*, a large fraction of cod <35 cm does not grow in length, gets thinner over time, and likely dies due to starvation.

The size distribution of cod is progressively truncated from 2009 onwards (Figure 6). There is more fish of the same, small size in the stock. The abundance of specimen >35–40 cm decreased drastically.

There are basin-specific differences in the development of hypoxic areas (Figure 7). Before the mid-1990s, hypoxic event was only temporary and, thus, the inter-annual extent of hypoxic areas varied extensively. Conversely, hypoxic area size in the Bornholm Basin reached a plateau in 1994 until 2001, when ~5000 km<sup>2</sup> of the bottom was hypoxic. Again between 2005 and 2010, hypoxia was constantly at high levels, corresponding to 6000 km<sup>2</sup>, in the Bornholm Basin. These two periods of long-term chronic hypoxia in the most important distributional and reproductive area for cod (Figure 7) have been unprecedented during the time series.

## Discussion

Our analyses revealed that decreased growth and survival of small cod may be an extension of the juvenile, post-settlement

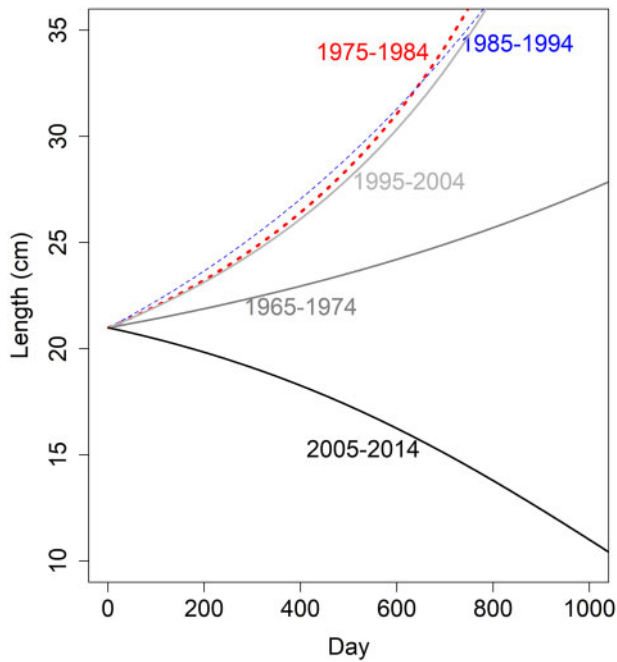

**Figure 5.** Simulated growth trajectories of *Gadus morhua* in the total length range 21–35 cm for the five decades covered by the stomach sampling programme.

bottleneck (Tupper and Boutilier, 1995; Hüsey *et al.*, 1997). Feeding levels of small cod have been critically low in recent years, at or even below minimum fish maintenance levels (Kitchell *et al.*, 1977; Andersen and Riis-Vestergaard, 2003). The low feeding levels most probably result from a decrease in benthic prey availability due to increased hypoxic areas. The resulting growth reduction in this life stage that we calculated based on a bioenergetics model is supported by the observed length distributions from the survey. The size structure of the cod population has changed towards smaller individuals. Our study emphasizes that, under the current ecosystem state, environmental forcing, as well as a decline in pelagic prey, causes changes in the consumption and growth rates of small cod in the Baltic Sea, resulting in an accumulation of small-sized cod in its population.

In our study, we modelled the expected changes in the cod growth from the changes in the stomach content data. The analyses suggest a reduction in growth that can explain the shift of the cod length distribution towards lower sizes over time. Moreover, the negative average modelled growth rate in the most recent period implies that many cod individuals die due to starvation. Only the fishes with feeding levels well above average will survive, though growing slowly. Size at sexual maturation ( $L_{50}$ ) has declined from 45 to 50 cm for females and 37 to 41 cm for males in 1984–1988 (Cardinale and Modin, 1999) to ~19 cm in 2015 (Köster *et al.*, 2017). Since we did not account for energy spent for maturation in our bioenergetics model, growth might have been slowed down even further, if energy was used for gonadal maturation. The surviving part of the population may be estimated by comparing the growth rates presented here, based on stomach data and bioenergetics modelling, to growth rates estimated independently, for example from tagging data. However, even in the absence of such analyses, the available survey data with practical absence of cod >40 cm in recent years, presented in

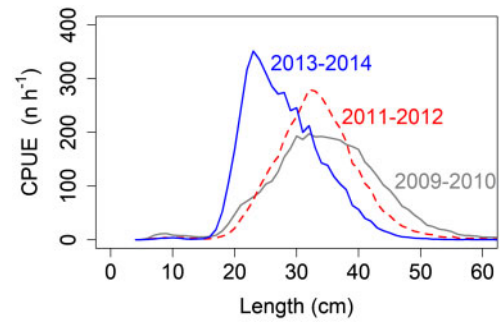

**Figure 6.** Catches per unit of effort (CPUE) for eastern Baltic cod by 1-cm cod length group for three different periods since 2009.

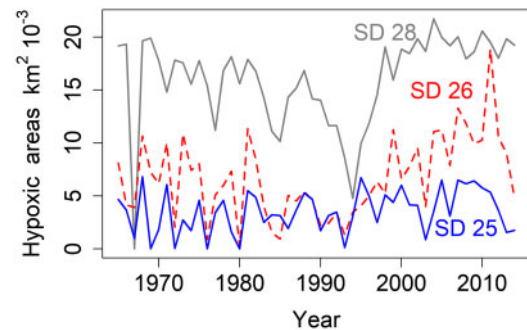

**Figure 7.** Extent of hypoxic bottom areas in different basins of the Baltic Sea during the stomach sampling programme. Hypoxic condition is defined as  $<1 \text{ ml l}^{-1}$  oxygen concentration and given in  $10^3 \text{ km}^2$ . The different basins are the Bornholm Basin (ICES sub-division 25), the Gdansk Deep (ICES sub-division 26), and the Gotland Basin (ICES sub-division 28).

this study, strongly support increased natural mortality and stunted growth. Although dead emaciated fish are found only very rarely in the environment, starvation nevertheless occurs frequently (Holdway and Beamish, 1984; Dutil and Lambert, 2000). The slower growth of the survivors renders small cod easier to be preyed upon by larger cod, because they remain longer in the size window that is vulnerable to predation. Starvation makes the cod probably more vulnerable to parasites, which is in line with recent observations of increasing liver worm *Contracaecum osculatum* infection in the eastern Baltic cod (Haarder *et al.*, 2014; Horbowy *et al.*, 2016; Sokolova *et al.*, 2018).

The growth reduction results in a change in cod size distribution with increased densities of smaller sizes. Since the relevant, benthic, and pelagic food items are scarce, as visible by their decline in the diet, implied by the extent of hypoxic areas and the observed decline in sprat biomass (Casini *et al.*, 2016), a feedback loop emerges, because the accumulation intensifies the competition for food in the benthivore life stage leading to further food limitation and growth reduction. Consequently, the growth is arrested and the population is trapped in an ontogenetic bottleneck. The bottleneck occurs below 30 cm and, thus, inhibits the ontogenetic trophic niche shift towards a diet dominated by pelagic fish. Furthermore, it stops the production of individuals that recruit into the commercial fisheries, currently at 35 cm (ICES, 2018). Thus, there are very few cod with above-average growth, and the survey size distributions (Figure 6) imply that

this fraction of large cod is decreasing over time. The stomach data indicate that the high average feeding levels of these large specimens are mainly caused by rare events of cannibalism, which nevertheless probably increase mortality for the small cod. Consequently, due to the decreasing abundance of large cod, the predatory impact of the cod population on larger prey, such as herring and flounder, decreases. In the area of cod distribution, Baltic sprat started to decline in the mid-1990s (Casini *et al.*, 2016). This decline coincides with the changes in the cod food intake after the regime shift. Coinciding with the sprat decline in the area of cod distribution, sprat consumption by cod also declined.

Recolonization time of benthic areas by invertebrates after an extended hypoxic period needs to be investigated to predict cod food availability after re-oxygenation of the deep water. Two prolonged stagnation periods in the main distributional area of the cod population have obviously decimated the benthic prey species. In this study, the cod stomachs themselves serve as indicators in the absence of reliable biomass data for benthic prey. Also, the abundance and spatial distribution of competitors for benthic prey, such as flounder (Orio *et al.*, 2019), have to be taken into account and could have worsened the feeding conditions for cod. Knowing the body size and condition that a predatory cod would need to successfully forage on the pelagic sprat would help to determine if reducing the commercial exploitation rate of sprat will potentially improve the food situation for the small, starving cod. These questions have to be answered spatially explicitly, probably on a scale smaller than the ICES sub-divisions, where biomass estimates of sprat match the prey field predatory cod experience.

Areas where feeding opportunities, growth, and condition of cod may be unaffected by hypoxia may exist in waters shallower than those covered by the BITS, of which >85% of the stations are located at depths >40 m and all on soft bottom. Stomach data from coastal areas would facilitate investigating the importance of shallow waters as source for replenishing the deteriorated population residing in deeper waters. However, juvenile cod has shifted its distribution towards deeper areas the last years (Orio *et al.*, 2019), suggesting that the shallow areas may currently not be that important after all.

Our study emphasizes that environmental forcing, giving rise to hypoxia, has probably triggered the observed changes in consumption and growth rates for cod in the Baltic Sea during the past decades by reducing the growth of pre-piscivorous specimens. Moreover, the resulting increased densities of small cod along with a decline in sprat densities have intensified the competition for food leading to further food limitation and growth reduction. Environmental changes decouple many population dynamic control mechanisms (Gårdmark *et al.*, 2015). Growth and mortality change independently of predator and prey densities and feedback loops that otherwise are considered key in the transition between alternative stable states (Möllmann *et al.*, 2009; Scheffer, 2009). Our results underline that the relation between population density and vital rates under environmental changes has to be understood mechanistically to fully comprehend the ecosystem changes currently observable in multiple places globally (Folke *et al.*, 2004) and to devise remedies where possible.

### Data accessibility

All data supporting the results are already available online at [www.ices.dk](http://www.ices.dk).

### Author contributions

STN was responsible for research design with assistance from MC and drafted the main text and figures. VB and AO preprocessed the data and improved the figures. STN, KHA, and NGA developed the modelling framework. STN, SN, UB, NK, and MC preprocessed data. DU compiled the major part of the stomachs data. All authors were involved in discussions and editing of the text.

### Acknowledgements

The study was performed under the umbrella of ICES Study Group on Spatial Analyses for the Baltic Sea and Workshop on Spatial Analyses for the Baltic Sea. This work resulted from the Joint Baltic Sea Research and Development Programme (BONUS) project “Integrating spatial processes into ecosystem models for sustainable utilisation of fish resources” (INSPIRE), which were supported by BONUS (Art 185), funded jointly by the European Union, Innovation Fund Denmark, Swedish Research Council Formas, and the Latvian Academy of Science (grant/award number: 2012-60). VB and NK were supported by the EU FP7 project MareFrame (Co-creating ecosystem-based fisheries management solutions) under grant agreement number 613571. MC was also supported by the Formas grant number 2018-00775. The fish data used in this study were collected during ordinary field monitoring under the EU Data Collection Framework, for which no species research or animal ethics permissions are required.

### References

- Alheit, J., Möllmann, C., Dutz, J., Kornilovs, G., Loewe, P., Mohrholz, V., and Wasmund, N. 2005. Synchronous ecological regime shifts in the central Baltic and the North Sea in the late 1980s. *ICES Journal of Marine Science*, 62: 1205–1215.
- Amundsen, P. A., and Klemetsen, A. 1988. Diet, gastric evacuation rates and food consumption in a stunted population of Arctic charr, *Salvelinus alpinus* L., in Takvatn, northern Norway. *Journal of Fish Biology*, 33: 697–709.
- Andersen, N. G. 2001. A gastric evacuation model for three predatory gadoids and implications of using pooled field data of stomach contents to estimate food rations. *Journal of Fish Biology*, 59: 1198–1217.
- Andersen, N. G. 2012. Influences of potential predictor variables on gastric evacuation in Atlantic cod *Gadus morhua* feeding on fish prey: parameterization of a generic model. *Journal of Fish Biology*, 80: 595–612.
- Andersen, N. G., and Beyer, J. E. 2005a. Mechanistic modelling of gastric evacuation in predatory gadoids applying the square root model to describe surface-dependent evacuation. *Journal of Fish Biology*, 67: 1392–1412.
- Andersen, N. G., and Beyer, J. E. 2005b. Gastric evacuation of mixed stomach contents in predatory gadoids: an expanded application of the square root model to estimate food rations. *Journal of Fish Biology*, 67: 1413–1433.
- Andersen, N. G., and Riis-Vestergaard, J. 2003. The effects of food consumption rate, body size and temperature on net food conversion efficiency in saithe and whiting. *Journal of Fish Biology*, 62: 395–412.
- Bagge, O. 1994. The Baltic cod. *Dana*, 10: 1–28.
- Brooks, J. L., and Dodson, S. I. 1965. Predation, body size, and composition of plankton. *Science*, 150: 28–35.
- Cardinale, M., and Modin, J. 1999. Changes in size-at-maturity of Baltic cod (*Gadus morhua*) during a period of large variations in stock size and environmental conditions. *Fisheries Research*, 41: 285–295.

- Carstensen, J., Conley, D. J., Bonsdorff, E., Gustafsson, B. G., Hietanen, S., Janas, U., Jilbert, T., *et al.* 2014. Hypoxia in the Baltic Sea: biogeochemical cycles, benthic fauna, and management. *Ambio*, 43: 26–36.
- Casini, M. 2013. Spatio-temporal ecosystem shifts in the Baltic Sea: top-down control and reversibility potential. *In* *Advances in Environmental Research*, 28, pp. 149–167. Ed. by J. A. Daniels. Nova Science Publishers, New York; ISBN: 978-1-62417-738-5.
- Casini, M., Käll, F., Hansson, M., Plikshs, M., Baranova, T., Karlsson, O., Lundström, K., *et al.* 2016. Hypoxic areas, density-dependence and food limitation drive the body condition of a heavily exploited marine fish predator. *Royal Society Open Science*, 3: 160416.
- Conley, D. J., Björck, S., Bonsdorff, E., Carstensen, J., Destouni, G., Gustafsson, B. G., Hietanen, S., *et al.* 2009. Hypoxia-related processes in the Baltic Sea. *Environmental Science & Technology*, 43: 3412–3420.
- Diaz, R. J., and Rosenberg, R. 2008. Spreading dead zones and consequences for marine ecosystems. *Science*, 321: 926–929.
- Deelder, C. L. 1951. A contribution to the knowledge of the stunted growth of perch (*Perca fluviatilis* L.) in Holland. *Hydrobiologia*, 3: 357–378.
- Domenici, P., and Blake, R. 1997. The kinematics and performance of fish fast-start swimming. *Journal of Experimental Biology*, 200: 1165–1178.
- Dutil, J. D., and Lambert, Y. 2000. Natural mortality from poor condition in Atlantic cod (*Gadus morhua*). *Canadian Journal of Fisheries and Aquatic Sciences*, 57: 826–836.
- Eero, M., Hjelm, J., Behrens, J., Buchmann, K., Cardinale, M., Casini, M., Gasyukov, P., *et al.* 2015. Eastern Baltic cod in distress: biological changes and challenges for stock assessment. *ICES Journal of Marine Science*, 72: 2180–2186.
- Folke, C., Carpenter, S., Walker, B., Scheffer, M., Elmqvist, T., Gunderson, L., and Holling, C. S. 2004. Regime shifts, resilience, and biodiversity in ecosystem management. *Annual Review of Ecology, Evolution, and Systematics*, 35: 557–581.
- Fretwell, S. D. 1987. Food chain dynamics: the central theory of ecology? *Oikos*, 50: 291–301.
- Gårdmark, A., Casini, M., Huss, M., van Leeuwen, A., Hjelm, J., Persson, L., and de Roos, A. M. 2015. Regime shifts in exploited marine food webs: detecting mechanisms underlying alternative stable states using size-structured community dynamics theory. *Philosophical Transactions of the Royal Society B*, 370: 20130262.
- Haarder, S., Kania, P. W., Galatius, A., and Buchmann, K. 2014. Increased *Contracaecum osculatatum* infection in Baltic cod (*Gadus morhua*) livers (1982–2012) associated with increasing grey seal (*Halichoerus gryphus*) populations. *Journal of Wildlife Diseases*, 50: 537–543.
- Hall, D. J., Threlkeld, S. T., Burns, C. W., and Crowley, P. H. 1976. The size-efficiency hypothesis and the size structure of zooplankton communities. *Annual Review of Ecology, Evolution, and Systematics*, 7: 177–208.
- Hansson, S., Rudstam, L. G., Kitchell, J. F., Peppard, P. E., Hildén, M., and Johnson, B. L. 1996. Predation rates by North Sea cod (*Gadus morhua*)—predictions from models on gastric evacuation and bioenergetics. *ICES Journal of Marine Science*, 53: 107–114.
- Holdway, D. A., and Beamish, F. W. H. 1984. Specific growth rate and proximate body composition of Atlantic cod (*Gadus morhua* L.). *Journal of Experimental Marine Biology and Ecology*, 81: 147–170.
- Horbowy, J., Podolska, M., and Nadolna-Ałtyn, K. 2016. Increasing occurrence of anisakid nematodes in the liver of cod (*Gadus morhua*) from the Baltic Sea: does infection affect the condition and mortality of fish? *Fisheries Research*, 179: 98–103.
- Hüssy, K., St John, M. A., and Böttcher, U. 1997. Food resource utilization by juvenile Baltic cod *Gadus morhua*: a mechanism potentially influencing recruitment success at the demersal juvenile stage? *Marine Ecology Progress Series*, 155: 199–208.
- Huwer, B., Neuenfeldt, S., Rindorf, A., Andreassen, H., Levinsky, S. E., Storr-Paulsen, M., Dalmann Ross, S., *et al.* 2014. Study on stomach content of fish to support the assessment of good environmental status of marine food webs and the prediction of MSY after stock restoration. Final Report for EU contract No MARE/2012/02. 56 pp.
- ICES. 1991. Manual for the ICES North Sea Stomach Sampling Project in 1991. ICES Document CM 1991/G: 3.
- ICES. 2014a. Report of the Study Group for Spatial Analyses for the Baltic Sea (SGSPATIAL). ICES Document CM 2014/SSGRSP: 08.
- ICES. 2014b. Report of the Baltic International Fish Survey Working Group (WGBIFS). ICES Document CM 2014/SSGESST: 13.
- ICES. 2018. Report of the Baltic Fisheries Assessment Working Group (WGBFAS). ICES Document CM 2018/ACOM: 11.
- Jobling, M. 1988. A review of the physiological and nutritional energetics of cod, *Gadus morhua* L., with particular reference to growth under farmed conditions. *Aquaculture*, 70: 1–19.
- Karlson, K., Rosenberg, R., and Bonsdorff, E. 2002. Temporal and spatial large-scale effects of eutrophication and oxygen deficiency on benthic fauna in Scandinavian and Baltic waters—a review. *Oceanography and Marine Biology—An Annual Review*, 40: 427–489.
- Kitchell, J. F., Stewart, D. J., and Weininger, D. 1977. Applications of a bioenergetics model to yellow perch (*Perca flavescens*) and wall-eye (*Stizostedion vitreum vitreum*). *Journal of the Fisheries Research Board of Canada*, 34: 1922–1935.
- Köster, F. W., Huwer, B., Hinrichsen, H. H., Neumann, V., Makarchouk, A., Eero, M., Dewitz, B. V., *et al.* 2017. Eastern Baltic cod recruitment revisited—dynamics and impacting factors. *ICES Journal of Marine Science*, 74: 3–19.
- Matthäus, W., and Schinke, H. 1994. Mean atmospheric circulation patterns associated with major Baltic inflows. *Deutsche Hydrografische Zeitschrift*, 46: 321–339.
- Möllmann, C., Diekmann, R., Müller-Karulis, B., Kornilovs, G., Plikshs, M., and Axe, P. 2009. Reorganization of a large marine ecosystem due to atmospheric and anthropogenic pressure: a discontinuous regime shift in the Central Baltic Sea. *Global Change Biology*, 15: 1377–1393.
- Murdoch, W. W. 1994. Population regulation in theory and practice. *Ecology*, 75: 271–287.
- Murray, B. G. 1994. On density dependence. *Oikos*, 69: 520–523.
- Neuenfeldt, S., and Beyer, J. E. 2003. Oxygen and salinity characteristics of predator–prey distributional overlaps shown by predatory Baltic cod during spawning. *Journal of Fish Biology*, 62: 168–183.
- Neuenfeldt, S., and Beyer, J. E. 2006. Environmentally driven predator–prey overlaps determine the aggregate diet of the cod *Gadus morhua* in the Baltic Sea. *Marine Ecology Progress Series*, 310: 151–163.
- Orio, A., Bergström, U., Florin, A. B., Lehmann, A., Šics, I., and Casini, M. 2019. Spatial contraction of demersal fish populations in a large marine ecosystem. *Journal of Biogeography*, 46: 633–645.
- Orio, A., Florin, A.-B., Bergström, U., Šics, I., Baranova, T., and Casini, M. 2017. Modelling indices of abundance and size-based indicators of cod and flounder stocks in the Baltic Sea using newly standardized trawl survey data. *ICES Journal of Marine Science*, 74: 1322–1333.
- Österblom, H., Hansson, S., Larsson, U., Hjerne, O., Wulff, F., Elmgren, R., and Folke, C. 2007. Human-induced trophic cascades and ecological regime shifts in the Baltic Sea. *Ecosystems*, 10: 877–889.
- Pachur, M. E., and Horbowy, J. 2013. Food composition and prey selection of cod, *Gadus morhua* (Actinopterygii: Gadiformes: Gadidae), in the southern Baltic Sea. *Acta Ichthyologica et Piscatoria*, 43.



- Pedersen, J., and Hislop, J. R. G. 2001. Seasonal variations in the energy density of fishes in the North Sea. *Journal of Fish Biology*, 59: 380–389.
- Pennington, M. 1985. Estimating the average food consumption by fish in the field from stomach contents data. *Dana*, 5: 87–94.
- Righton, D. A., Andersen, K. H., Neat, F., Thorsteinsson, V., Steingrund, P., Svedäng, H., Michalsen, K., et al. 2010. Thermal niche of Atlantic cod *Gadus morhua*: limits, tolerance and optima. *Marine Ecology Progress Series*, 420: 1–13.
- Scheffer, M. 2009. *Critical Transitions in Nature and Society*, 16. Princeton University Press, New Jersey, USA.
- Svedäng, H., and Hornborg, S. 2014. Selective fishing induces density-dependent growth. *Nature Communications*, 5: 4152.
- Sokolova, M., Buchmann, K., Huwer, B., Kania, P. W., Krumme, U., Galatius, A., Hemmer-Hansen, J., et al. 2018. Spatial patterns in infection of cod *Gadus morhua* with the seal-associated liver worm *Contracaecum osculatatum* from the Skagerrak to the central Baltic Sea. *Marine Ecology Progress Series*, 606: 105–118.
- Tupper, M., and Boutilier, R. G. 1995. Effects of habitat on settlement, growth, and postsettlement survival of Atlantic cod (*Gadus morhua*). *Canadian Journal of Fisheries and Aquatic Sciences*, 52: 1834–1841.
- Turchin, P. 2003. *Complex Population Dynamics: A Theoretical/Empirical Synthesis*, 35. Princeton University Press, New Jersey, USA.
- Ursin, E. 1967. A mathematical model of some aspects of fish growth, respiration, and mortality. *Journal of the Fisheries Board of Canada*, 24: 2355–2453.
- Uzars, D. 1994. Feeding of cod (*Gadus morhua callarias* L.) in the central Baltic in relation to environmental changes. *ICES Marine Science Symposia*, 198: 612–623.
- Werner, E. E. 1974. The fish size, prey size, handling time relation in several sunfishes and some implications. *Journal of the Fisheries Board of Canada*, 31: 1531–1536.
- Werner, E. E., and Gilliam, J. F. 1984. The ontogenetic niche and species interactions in size-structured populations. *Annual Review of Ecology, Evolution, and Systematics*, 15: 393–425.

Handling editor: Henn Ojaveer
